# Supplementary material for: Analysis of the Clinical Incidence and Correlation between Colorectal Cancer and Microorganisms
Source: bioRxiv or medRxiv preprint supplement (doi:10.1101/2023.06.14.23291347), 2023-06-18
Supplement: Supplementary file [file media-3.pdf]

| CRC Case | Sex    | Order/Test                               | BMI   | Histological Type                  | Location | Tumor Size (cm) | pTNM    | Differentiation                         | Co-occurring GI Disorder         |
|----------|--------|------------------------------------------|-------|------------------------------------|----------|-----------------|---------|-----------------------------------------|----------------------------------|
| 1        | male   | Expedited covid 19, CORONAVIRUS (S       | 21.1  | adenocarcinoma                     | left     |                 | pT4     |                                         |                                  |
| 2        | female | two pre procedure and pre operative c    | 30.6  | adenocarcinoma                     | left     | 0.7             | pT1     | well differentiated                     |                                  |
| 3        | male   | two pre procedure and pre operative c    | 22.1  | adenocarcinoma                     | left     |                 | pT4     | moderately differentiated               |                                  |
| 4        | female | expedited covid19                        | 22.38 | intramucosal adenocarcinoma        | right    |                 |         |                                         | GERD                             |
| 5        | female | coronavirus (sars cov 2 access labs), p  | 21.5  | adenocarcinoma                     | right    | 1               | pT3     | moderately differentiated               | GERD                             |
| 6        | female | covid-19 PCR nasopharynx (bio-ref), C    | 30.12 | adenocarcinoma                     | left     | 2.5             | pT2     |                                         | Ulcerative Colitis               |
| 9        | male   | expedited covid19                        | 26.96 | adenocarcinoma                     | right    | 3.5             | pT3     | moderately differentiated               | GERD                             |
| 10       | male   | pre procedure and pre operative covid    | 24.1  | mixed neuroendocrine carcinoma-ade | left     |                 |         |                                         |                                  |
| 11       | female | pre procedure and pre operative covid    | 23.9  | adenocarcinoma                     | left     |                 | pT1     | well differentiated                     |                                  |
| 12       | male   | pre procedure and pre operative covid    | 26    | adenocarcinoma                     | left     | 1.5             | pT4     | moderately differentiated               |                                  |
| 13       | female | pre procedure and pre operative covid    | 37.5  | adenocarcinoma                     | left     | 0.4             | pT1     | moderately differentiated               | GERD                             |
| 15       | male   | 2019 coronavirus, coronavirus (sars co   | 24.13 | adenocarcinoma                     | left     | 3.5             | pT2     | moderately differentiated               | GERD                             |
| 16       | female | two pre procedure and pre operative c    | 25.99 | adenocarcinoma                     | right    | 4               | pT4     | moderately differentiated               |                                  |
| 17       | male   | coronavirus (sars cov 2 access labs), p  | 26.89 | adenocarcinoma                     | left     | 1               | pT1     | moderately differentiated               | GERD                             |
| 18       | male   | coronavirus (sars cov 2 access labs), e  | 28.12 | adenocarcinoma                     | left     |                 |         | moderately differentiated               |                                  |
| 19       | female | CCIRH rapid covid19, covid-19 PCR na     | 25.6  | adenocarcinoma                     | left     | 5.5             | pT3     | moderately differentiated               |                                  |
| 21       | female | four 2019 coronavirus, expedited cov     | 24.2  | adenocarcinoma                     | left     | 5.5             | pT3     | moderately differentiated               | Type II Diabetes Mellitus        |
| 23       | female | pre procedure and pre operative covid    | 19.77 | signet-ring cell carcinoma         | left     | 3               | pT4     | poorly differentiated                   |                                  |
| 24       | male   | two 2019 coronavirus, pre procedure      | 29.7  | adenocarcinoma                     | left     |                 |         | moderately differentiated               |                                  |
| 25       | female | two pre procedure and pre operative c    | 25    | adenocarcinoma                     | left     | 4.3             | pT3     | moderately differentiated               |                                  |
| 26       | male   | covid-19 PCR nasopharynx (BIOREF)        | 28.94 | adenocarcinoma                     | right    | 0.8             |         | moderately differentiated               | Type II Diabetes Mellitus        |
| 27       | male   | pre procedure and pre operative covid    | 32.2  | adenocarcinoma                     | right    | 4.2             | pT1     | well differentiated                     | GERD                             |
| 28       | female | expedited covid19                        | 29.1  | mucinous adenocarcinoma            | left     | 1.8             | pT2     |                                         |                                  |
| 29       | male   | pre procedure and pre operative covid    | 36.78 | adenocarcinoma                     | right    | 0.4             | pT3     | well differentiated                     | GERD                             |
| 30       | male   | pre procedure and pre operative covid    | 30.2  | adenocarcinoma                     | right    |                 |         |                                         | GERD                             |
| 31       | female | pre procedure and pre operative covid    | 31.16 | adenocarcinoma                     | right    | 4.5             | pT2     | moderately differentiated               |                                  |
| 32       | female | pre procedure and pre operative covid    | 23.6  | adenocarcinoma                     | left     |                 |         | moderately differentiated               |                                  |
| 33       | female | three pre procedure and pre operative    | 19.1  | squamous cell carcinoma            | left     | 3.4             | pT2     | moderately differentiated               |                                  |
| 34       | male   | pre procedure and pre operative covid    | 25.1  | squamous cell carcinoma            | left     | 0.4             |         | moderately differentiated               |                                  |
| 35       | female | expedited covid19                        | 23.68 | neuroendocrine carcinoma           | right    | 6               | pT3     | poorly differentiated                   |                                  |
| 36       | female | expedited covid                          | 28.3  | adenocarcinoma                     | right    | 1.5             | pT1     | moderately differentiated               |                                  |
| 37       | female | coronavirus (sars cov 2 access labs)     | 22.3  | adenocarcinoma                     | right    | 4.5             | pT4     | moderately differentiated               |                                  |
| 38       | female | covid19 PCR nasopharynx (BIOREF)         | 23.6  | adenocarcinoma                     | left     | 5.5             | pT3     | well differentiated                     |                                  |
| 39       | female | expedited covid19, coronavirus (sars     | 30.8  | adenocarcinoma                     | left     | 3               | pT2     | well differentiated                     | Ulcerative Colitis               |
| 40       | male   | two coronavirus (sars cov 2 access lab)  | 28    | mucinous adenocarcinoma            | left     | 4.5             | pT3     |                                         | GERD                             |
| 41       | male   | three coronavirus (sars cov 2 access lab | 30.4  | adenocarcinoma                     | left     | 0.3             | pT3     | moderately differentiated               | Type II Diabetes Mellitus        |
| 42       | female | coronavirus (sars cov 2 access labs), si | 33.2  | adenocarcinoma                     | left     | 0.7             | pT2     | moderately differentiated               |                                  |
| 43       | male   | pre procedure and pre operative covid    | 27.1  | squamous cell carcinoma            | left     | 3               | pT2     | moderately differentiated               | GERD                             |
| 45       | male   | expedited covid19                        | 23.7  | adenocarcinoma                     | left     | 5.5             | pT3     | moderately differentiated               | GERD                             |
| 46       | female | expedited covid19                        | 24.24 | mucinous adenocarcinoma            | right    | 5               | pT3     | poorly differentiated                   | GERD                             |
| 47       | female | pre procedure and pre operative covid    | 28.91 | adenocarcinoma                     | right    | 4.5             | pT3     | moderately differentiated               |                                  |
| 48       | male   | expedited covid19                        | 26.1  | adenocarcinoma                     | right    | 1.5             | pT2     | moderately differentiated               |                                  |
| 49       | male   | pre procedure and pre operative covid    | 26.2  | adenocarcinoma                     | left     | 3               | pT3     | moderately differentiated               |                                  |
| 55       | male   | coronavirus (sars cov 2 access labs), si | 24.5  | adenocarcinoma                     | left     | 3.5             | pT3     | moderately differentiated               | Type II Diabetes Mellitus        |
| 56       | male   | 2019 coronavirus, two coronavirus (s     | 30.4  | adenocarcinoma                     | right    | 4               | pT2     | moderately differentiated               | GERD                             |
| 57       | male   | sars cov 2 rapid result antigen test     | 26.8  | adenocarcinoma                     | left     | 2.5             | pT1     | moderately differentiated               |                                  |
| 58       | male   | expedited covid19                        | 27.12 | adenocarcinoma                     | left     | 3               | pT4     | moderately differentiated               | GERD                             |
| 59       | male   | four sars-cov-2 molecular POCT covid     | 28.3  | adenocarcinoma                     | left     | 4               | pT3     | poorly differentiated                   |                                  |
| 60       | male   | expedited covid19, two sars-cov-2 PC     | 28.9  | adenocarcinoma                     | left     | 4               | pT3     | moderately differentiated               | Type II Diabetes Mellitus        |
| 61       | male   | pre procedure and pre operative covid    | 30.4  | adenocarcinoma                     | left     | 4.5             | pT2     | moderately differentiated               | GERD                             |
| 62       | female | two sars-cov-2 RNA, pre procedure an     | 21.14 | adenocarcinoma                     | left     | 2.5             | pT3     | moderately differentiated               |                                  |
| 64       | female | 2019 coronavirus, three pre procedur     | 28.5  | adenocarcinoma                     | left     | 4.5             | pT3     | poorly differentiated                   |                                  |
| 66       | male   | two sars-cov-2 RNA, expedited covid1     | 38.2  | adenocarcinoma                     | left     | 5               | pT3     | moderately differentiated               | Type II Diabetes Mellitus        |
| 68       | male   | expedited covid19, pre procedure anc     | 27.4  | adenocarcinoma                     | left     | 3.5             | pT3     | moderately differentiated               | GERD                             |
| 69       | male   | expedited covid19, 2019 coronavirus      | 42.8  | mucinous adenocarcinoma            | right    | 5               | pT3     | moderately differentiated               |                                  |
| 73       | female | pre procedure and pre operative covid    | 48    | adenocarcinoma                     | left     | 3               | pT2     | moderately differentiated               |                                  |
| 75       | male   | 2019 coronavirus, pre procedure and      | 20.5  | adenocarcinoma                     | right    | 7               | pT4     | well differentiated                     |                                  |
| 76       | male   | 2019 coronavirus                         | 27.83 | adenocarcinoma                     | right    | 7.5             | pT3     | moderately differentiated               | GERD                             |
| 77       | male   | pre procedure and pre operative covid    | 24.65 | adenocarcinoma                     | left     | 7               | pT4     |                                         |                                  |
| 79       | male   | sars-cov-2 PCR                           | 21.7  | adenocarcinoma                     | left     | 3.2             | pT2     | moderately differentiated               |                                  |
| 80       | female | 2019 coronavirus, coronavirus (sars co   | 27.21 | adenocarcinoma                     | left     | 2               | pT2     | moderately differentiated               | GERD                             |
| 81       | female | sars-cov-2 RNA, expedited covid19, c     | 24.55 | adenocarcinoma                     | left     |                 |         |                                         | GERD                             |
| 84       | female | coronavirus (sars cov 2 access labs)     | 21.1  | adenocarcinoma                     | left     | 7               | pT4     | poorly differentiated                   |                                  |
| 85       | male   | pre procedure and pre operative covid    | 30.5  | adenocarcinoma                     | left     | 4.5             | pT2     | moderately differentiated               |                                  |
| 93       | female | 2019 coronavirus, pre procedure and      | 20.98 | adenocarcinoma                     | left     | 6               | pT4     | moderately differentiated               | GERD                             |
| 103      | female | pre procedure and pre operative covid    | 19.9  | adenocarcinoma                     | left     | 1.8             | pT2     | moderately differentiated               |                                  |
| 113      | male   | expedited covid19, two sars cov 2 PCF    | 28.1  | adenocarcinoma                     | right    | 8.5,2           | pT3,pT1 | moderately differentiated, well differe | Type II Diabetes Mellitus & GERD |
| 114      | male   | expedited covid + flu A/B, four pre pr   | 31.74 | adenocarcinoma                     | right    | 3.8             | pT3     | moderately differentiated               | GERD                             |
| 115      | male   | pre procedure and pre operative covid    | 27.67 | adenocarcinoma                     | left     | 3               | pT2     | poorly differentiated                   |                                  |
| 117      | male   | pre procedure and pre operative covid    | 31.31 | adenocarcinoma                     | right    | 4.5             | pT4     | moderately differentiated               | GERD                             |
| 119      | male   | expedited covid, expedited covid + flu   | 29.35 | adenocarcinoma                     | left     | 2.5             | pT2     | poorly differentiated                   |                                  |
| 121      | female | expedited covid19                        | 24.4  | adenocarcinoma                     | right    | 4.6             | pT3     | moderately differentiated               |                                  |
| 124      | male   | two expedited covid19,                   | 26.23 | medullary carcinoma                | right    | 11              | pT3     |                                         |                                  |
| 126      | male   | 2019 coronavirus, pre operative and c    | 30    | adenocarcinoma                     | left     | 3.5             | pT3     | poorly differentiated                   | type II Diabetes Mellitus & GERD |
| 130      | male   | two expedited covid,                     | 23    | adenocarcinoma                     | right    | 10              | pT3     | moderately differentiated               |                                  |
| 136      | female | two expedited covid                      | 18.11 | adenocarcinoma                     | left     | 2               | pT2     | moderately differentiated               | type II Diabetes Mellitus        |
| 137      | female | pre procedure and pre operative covid    | 21.8  | adenocarcinoma                     | right    | 1.5             | pT1     | moderately differentiated               |                                  |
| 142      | female | expedited covid19                        | 24.8  | adenocarcinoma                     | right    | 2.8             | pT3     | moderately differentiated               |                                  |
| 146      | male   | three H&E/IHC stains, coronavirus (sa    | 28.3  | adenocarcinoma                     | right    | 3.5             | pT3     | moderately differentiated               |                                  |
| 149      | male   | expedited covid19                        | 31.34 | adenocarcinoma                     | left     | 2.5             |         | poorly differentiated                   | GERD                             |
| 152      | male   | two expedited covid19                    | 23.47 | adenocarcinoma                     | left     | 2               | pT3     |                                         | GERD                             |
| 153      | male   | two 2019 coronavirus, covid19 PCR ni     | 27.67 | adenocarcinoma                     | left     | 3.5             | pT1     | moderately differentiated               |                                  |
| 161      | female | two coronavirus (sars cov 2 access lab)  | 32.65 | adenocarcinoma                     | left     | 2.5             | pT2     | moderately differentiated               | GERD                             |
| 164      | female | coronavirus (sars cov 2 access labs), ts | 24.8  | adenocarcinoma                     | left     | 2.5             | pT2     | moderately differentiated               | GERD                             |
| 172      | male   | pre procedure and pre operative covid    | 29.07 | adenocarcinoma                     | right    | 2.5             | pT4     |                                         |                                  |
| 178      | male   | two expedited covid19, two pre proce     | 26.05 | adenocarcinoma                     | right    | 6.2             | pT4     | moderately differentiated               | type II Diabetes Mellitus        |
| 179      | female | expedited covid19, pre procedure anc     | 26.15 | adenocarcinoma                     | left     | 4               | pT4     | moderately differentiated               | GERD                             |
| 181      | male   | sars-cov-2                               | 26.62 | adenocarcinoma                     | left     | 1               | pT2     | moderately differentiated               | type II Diabetes Mellitus        |
| 182      | female | expedited covid19, Sars-Cov-2            | 30.73 | squamous cell carcinoma            | left     | 2               |         | poorly differentiated                   |                                  |
| 187      | male   | coronavirus (sars cov 2 access labs), e  | 24.74 | adenocarcinoma                     | left     | 4.5             | pT2     | moderately differentiated               | GERD                             |
| 195      | male   | expedited covid19, two covid19 PCR,      | 18.19 | adenocarcinoma                     | left     | 1.6             | pT4     |                                         | GERD                             |
| 205      | male   | two expedited covid, two coronavirus     | 34.67 | adenocarcinoma                     | right    | 0.3             |         | moderately differentiated               |                                  |
| 206      | male   | 2019 coronavirus, expedited covid19      | 30.06 | squamous cell carcinoma            | left     | 10.2            | pT3     | moderately differentiated               | GERD                             |
| 207      | female | two CCIRH rapid covid                    | 25.9  | adenocarcinoma                     | left     | 4.1             | pT1     | moderately differentiated               | GERD                             |
| 208      | female | expedited covid, pre procedure and p     | 17.12 | adenocarcinoma                     | left     | 5               | pT2     |                                         | GERD                             |
| 211      | male   | coronavirus (sars cov 2 access lab) pre  | 21.8  | adenocarcinoma                     | left     |                 |         | moderately differentiated               |                                  |
| 215      | male   | three pre procedure and pre operative    | 34.31 | adenocarcinoma                     | left     | 6               | pT2     | moderately differentiated               |                                  |
| 217      | male   | expedited covid19, two coronavirus (s    | 22.78 | adenocarcinoma                     | left     | 5               | pT4     | moderately differentiated               | GERD                             |
| 219      | male   | two expedited covid19, 2019 coronav      | 30.73 | squamous cell carcinoma            | left     | 4               | pT4     | moderately differentiated               | type II Diabetes Mellitus        |
| 229      | male   | expedited covid19, rapid SARS-COV-2      | 31.2  | adenocarcinoma                     | left     | 4.5             | pT3     | moderately differentiated               |                                  |
| 239      | female | pre procedure and pre operative covid    | 34.57 | adenocarcinoma                     | left     | 0.1             | pT1     | well differentiated                     |                                  |
